# Supplementary material for: Arabidopsis Toxicos en Levadura 12 (ATL12): A Gene Involved in Chitin-Induced, Hormone-Related and NADPH Oxidase-Mediated Defense Responses
Source: MDPI journal article supplement (doi:10.3390/jof7100883), 2021-10-19
Supplement: s1 [file s1]

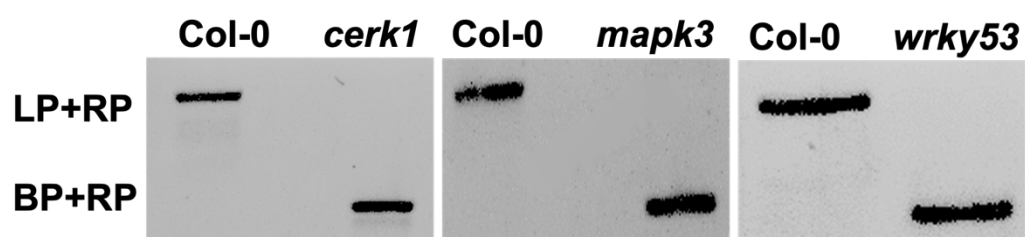

**Figure S3. Screening for homozygous *cerk1*, *mapk3* and *wrky53* mutants.** Amplification of *ATL12* in genomic DNA from the wild type, mutants of *cerk1*, *mapk3*, and *wrky53*. LP and RP are mutant-specific gene primers. BP is the border primer in T-DNA insertional chunk in the mutant.
