# Supplementary material for: Arabidopsis Toxicos en Levadura 12 (ATL12): A Gene Involved in Chitin-Induced, Hormone-Related and NADPH Oxidase-Mediated Defense Responses
Source: MDPI journal article supplement (doi:10.3390/jof7100883), 2021-10-19
Supplement: s1 [file s1]

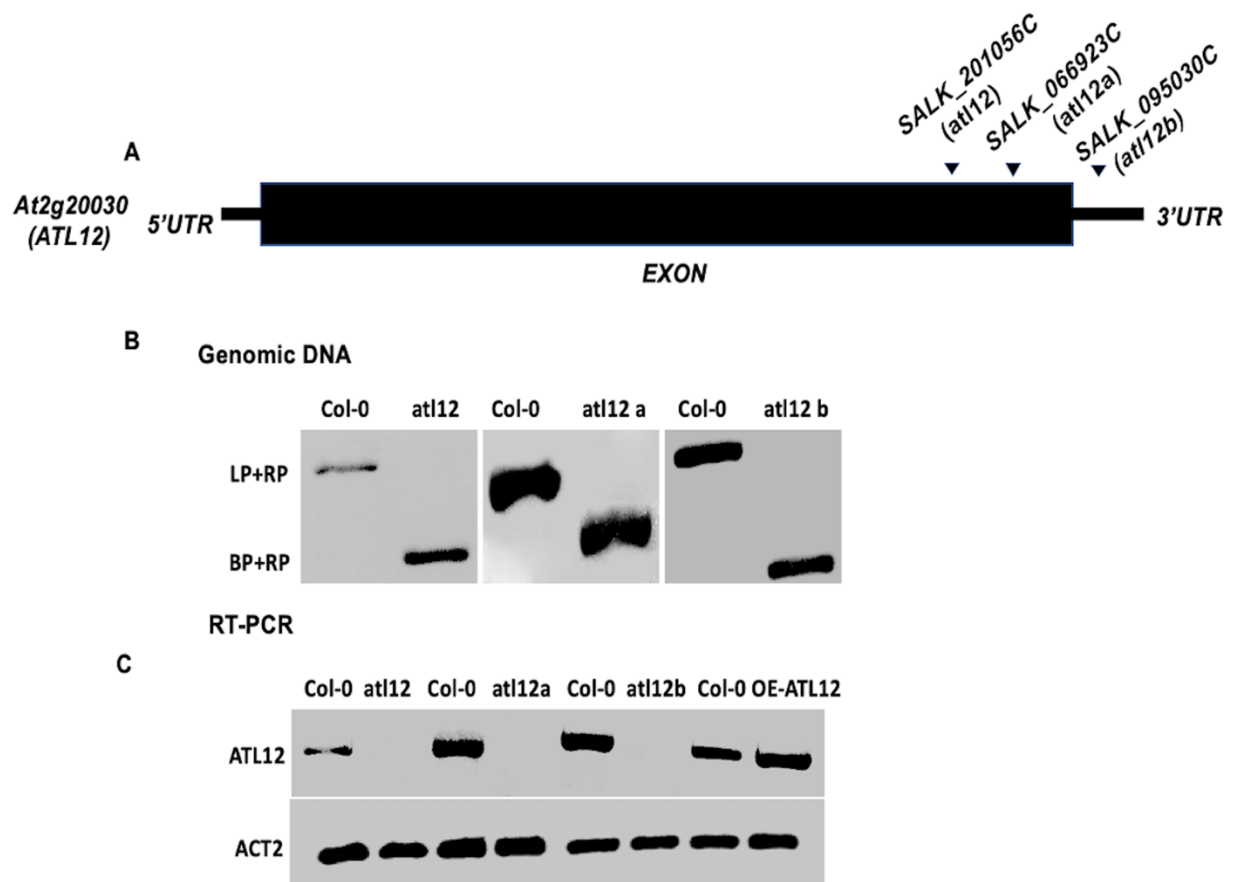

**Figure S2.** Screen for homozygous T-DNA insertion mutants and overexpression lines.

**A.** Analyses of T-DNA mutants in the AT2G20030 gene. The locations of the T-DNA insertions in the AT2G20030 gene, SALK\_066923C, SALK\_095030C, and SALK\_201056C, are shown by arrowheads. **B.** Amplification of ATL12 in genomic DNA from the wild type, atl12, atl12a, and atl12b. LP and RP are mutant-specific gene primers. BP is border primer in T-DNA insertional chunk in mutant. **C.** RT-PCR analysis of ATL12 expression in the wild type, the mutants, and overexpression seedlings.
